1 **Effects of long-term *in vivo* micro-CT imaging on**  
2 **hallmarks of osteopenia and frailty in aging mice**

3

4

5 Ariane C. Scheuren<sup>1</sup>, Gisela A. Kuhn<sup>1</sup>, Ralph Müller<sup>1\*</sup>

6 <sup>1</sup>Institute for Biomechanics, ETH Zurich, Zurich, Switzerland

7

8 \* Corresponding author

9 Prof. Ralph Müller, PhD

10 E: ram@ethz.ch

11

## 12 **Abstract**

13 *In vivo* micro-CT has already been used to monitor microstructural changes of bone in mice of  
14 different ages and in models of age-related diseases such as osteoporosis. However, as aging is  
15 accompanied by frailty and subsequent increased sensitivity to external stimuli such as handling  
16 and anesthesia, the extent to which longitudinal imaging can be applied in aging studies remains  
17 unclear. Consequently, the potential of monitoring individual mice during the entire aging  
18 process – from healthy to frail status – has not yet been exploited. In this study, we assessed the  
19 effects of long-term *in vivo* micro-CT imaging on hallmarks of aging both on a local (i.e., static  
20 and dynamic bone morphometry) and systemic (i.e., frailty index (FI) and body weight) level  
21 at various stages of the aging process. Furthermore, using a premature aging model  
22 ( $\text{PolgA}^{\text{(D257A/D257A)}}$ ), we assessed whether these effects differ between genotypes.

23 The 6<sup>th</sup> caudal vertebrae of 4 groups of mice ( $\text{PolgA}^{\text{(D257A/D257A)}}$  and  $\text{PolgA}^{(+/+)}$ ) were monitored  
24 by *in vivo* micro-CT every 2 weeks. One group was subjected to 11 scans between weeks 20  
25 and 40 of age, whereas the other groups were subjected to 5 scans between weeks 26-34, 32-40  
26 and 40-46, respectively. The long-term monitoring approach showed small but significant  
27 changes in the static bone morphometric parameters compared to the other groups. However,  
28 no interaction effect between groups and genotype was found, suggesting that *PolgA* mutation  
29 does not render bone more or less susceptible to long-term micro-CT imaging. The differences  
30 between groups observed in the static morphometric parameters were less pronounced in the  
31 dynamic morphometric parameters. Moreover, the body weight and FI were not affected by  
32 more frequent imaging sessions. Finally, we observed that longitudinal designs including  
33 baseline measurements already at young age are more powerful at detecting hallmarks of aging  
34 than those including multiple groups with fewer imaging sessions.

35 **Keywords:**

36 Aging, frailty, bone, *in vivo* micro-CT imaging, frailty index

37

## 38 Introduction

39 With the estimated increase in life expectancy in the next 30 years [1], the number of people  
40 suffering from frailty will also substantially increase [2, 3]. Characterized by the decline in  
41 multiple physiological functions, which collectively result in the accumulation of health  
42 deficits, frailty leads to a higher vulnerability to adverse health outcomes including falls and  
43 osteoporotic fractures [2]. Indeed, measuring frailty, using tools such as the frailty phenotype  
44 [4] or frailty index (FI) [5], has been shown to be predictive of osteoporotic fractures [6-9].  
45 Hence, the combined assessment of frailty and of skeletal health could be beneficial for the  
46 clinical diagnosis of osteoporosis and of frailty.

47 With the advent of longitudinal *in vivo* phenotyping tools such as the clinical mouse frailty  
48 index (FI) [2], animal models of frailty are of increasing interest in aging studies as the  
49 accumulation of health deficits can be quantified over time in individual animals [10-12].  
50 Likewise, longitudinal *in vivo* micro-CT imaging – allowing a non-invasive quantitative and  
51 qualitative assessment of the 3D bone micro-architecture over time in individual animals – has  
52 become of key importance to investigate time-dependent effects of pathologies and/or  
53 treatments in preclinical studies [13, 14]. Combined with advanced image registration  
54 techniques, bone formation as well as bone resorption activities can be directly quantified by  
55 registering consecutive time-lapsed images onto one another [15, 16]. Furthermore, the addition  
56 of computational models has been highly valuable to non-invasively estimate bone strength as  
57 well as local mechanical properties associated with aging [17, 18] and/or different interventions  
58 [19-21]. However, despite the numerous advantages of *in vivo* micro-CT imaging, the effects  
59 of cumulative radiation, anesthesia and handling both on a local level –i.e., on the micro-  
60 architecture and function of the scanned tissue - as well as on the systemic level – i.e., on the  
61 general well-being of the animals - must be considered [13, 14, 22, 23]. Several studies have

62 investigated the effects of repeated *in vivo* micro-CT imaging on bone morphometric  
63 parameters in rodents, however the reports have been controversial [20, 24-30]. While *in vivo*  
64 micro-CT imaging has been shown to have dose-dependent effects on bone morphometric  
65 parameters in adolescent rats [28], studies in ovariectomized [24, 26] and adult rats [27] have  
66 shown no effects of repeated *in vivo* micro-CT imaging. Similarly, studies using mouse models  
67 have shown small but significant effects in the trabecular bone compartment [20, 24], whereas  
68 other studies reported no imaging associated effects on bone morphometric parameters [25, 29,  
69 30]. Furthermore, the effects of repeated *in vivo* micro-CT imaging on bone morphometry have  
70 been shown to be dependent on the age of the animals, with older animals being less sensitive  
71 to imaging associated changes in bone morphometry [20]. Conversely, aged mice are known to  
72 be more sensitive to handling and anesthesia [31, 32], and hence, the extent to which long-term  
73 longitudinal micro-CT imaging can be applied to monitor individual mice during the entire  
74 process of aging remains unclear.

75 Using an established *in vivo* micro-CT approach to monitor the 6<sup>th</sup> caudal vertebrae [15, 33],  
76 we have previously shown that 5 imaging sessions did not have an effect on the bone micro-  
77 architecture and remodeling rates in 15-week old C57BL/6 mice. This approach has  
78 subsequently been used in middle-aged and aged mice [17]. By combining long-term *in vivo*  
79 micro-CT imaging of the 6<sup>th</sup> caudal vertebrae with longitudinal FI measurements, we have  
80 recently identified hallmarks of frailty and senile osteoporosis in the PolgA<sup>(D257A/D257A)</sup> mutator  
81 mouse [34, 35], which, due to a defect in the proofreading activity of its mitochondrial DNA  
82 polymerase gamma, exhibits a premature aging phenotype [36, 37]. In this study, we assessed  
83 whether this long-term *in vivo* micro-CT imaging approach has biasing effects on the local and  
84 systemic level at various stages of the aging process, and whether these effects differ between  
85 genotypes. Specifically, we compared static and dynamic bone morphometric parameters as

86 well as body weight and FI measurements of PolgA<sup>(+/+)</sup> (in the following referred to as WT)  
87 and PolgA<sup>(D257A/D257A)</sup> (in the following referred to as PolgA) mice subjected to 11 consecutive  
88 imaging sessions with those of mice subjected to 5 consecutive imaging sessions at various  
89 ages. By performing both cross-sectional comparisons between genotypes and between imaging  
90 groups (i.e., that were scanned at different time-points) as well as longitudinal comparisons  
91 within individual animals (i.e., that were scanned both at young and old age), we finally aimed  
92 to provide important insight for the effective design of studies applying *in vivo* micro-CT  
93 imaging in aging mice.

## 94 **Materials and methods**

### 95 **Study design**

96 To assess potential effects of increased radiation, anesthesia and handling associated with  
97 repeated *in vivo* micro-CT imaging, n=88 female mice were aged in parallel and divided into  
98 four groups (with n=12 PolgA<sup>(D257A/D257A)</sup> (referred to as PolgA) and n=10 PolgA<sup>(+/+)</sup> (referred to  
99 as WT) per group). The first group was scanned over 20 weeks (11 scans between the age of 20-  
100 40 weeks), whereas the other groups were scanned over 8 weeks (5 scans between weeks 26-34,  
101 32-40 and 40-46, respectively) as illustrated in Fig 1. For each group, the two last scans  
102 overlapped with the two first scans of the subsequent group to allow comparison of the dynamic  
103 morphometric parameters between groups. All mouse experiments described in the present  
104 study were carried out in strict accordance with the recommendations and regulations in the  
105 Animal Welfare Ordinance (TSchV 455.1) of the Swiss Federal Food Safety and Veterinary  
106 Office and were approved by the local authorities (license numbers 262/2016, Verterinäramt  
107 des Kantons Zürich, Zurich, Switzerland).

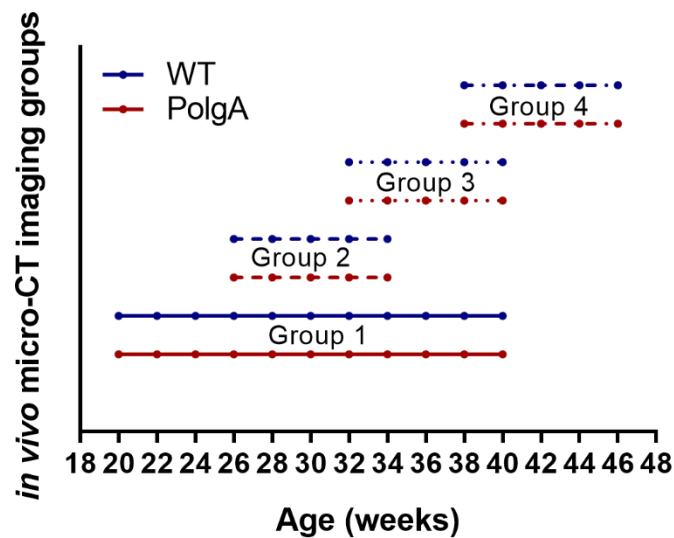

108

109 **Fig 1 Illustration of the study design showing the time-points and duration of *in vivo***  
110 **micro-CT imaging for the four groups of mice.**

111 Each group consists of n=12 PolgA (displayed in red) and n=10 WT (displayed in blue).

## 112 **Animals**

113 A colony of the mouse strain expressing an exonuclease-deficient version of the mitochondrial  
114 DNA polymerase  $\gamma$  (PolgA<sup>(D257A)</sup>, B6.129S7(Cg)-Polg<sup>tm1Pro1</sup>/J, JAX stock 017341, The Jackson  
115 Laboratory, Farmington CT, USA) was bred and maintained at the ETH Phenomics Center  
116 (12h:12h light-dark cycle, maintenance feed and water ad libitum, 3-5 animals/cage) as  
117 previously described [34, 35]. The presence of the PolgA knock-in mutation was confirmed by  
118 extracting DNA from ear clips (Sigma-Aldrich, KAPA Express Extract, KK7103) followed by  
119 qPCR (Bio-Rad, SsoAdvanced Universal SYBR Green Supermix, 1725272) and melt curve  
120 analysis. The primers used for genotyping (5' to 3'; Rev Common: AGT AGT CCT GCG CCA  
121 ACA CAG; Wild type forward: GCT TTG CTT GAT CTC TGC TC; Mutant forward: ACG  
122 AAG TTA TTA GGT CCC TCG AC) were recommended by the Jackson Laboratory.

## 123 **Micro-CT imaging and analysis**

124 *In vivo* micro-CT (vivaCT 40, Scanco Medical AG, isotropic nominal resolution: 10.5  $\mu\text{m}$ ; 55  
125 kVp, 145  $\mu\text{A}$ , 350 ms integration time, 500 projections per 180°, scan duration ca. 15 min,  
126 radiation dose per scan ca. 640 mGy) scans of the 6<sup>th</sup> caudal vertebrae were performed every 2  
127 weeks. Animals were anesthetized with isoflurane (induction/maintenance: 5%/1-2%  
128 isoflurane/oxygen). Micro-CT data was processed and standard bone microstructural  
129 parameters were calculated in trabecular, cortical and whole bone by using automatically  
130 selected masks for these regions as described previously [33]. To calculate dynamic  
131 morphometric parameters, micro-CT images from consecutive time-points were registered onto  
132 one another. The voxels present only at the initial time point were considered resorbed whereas  
133 voxels present only at the later time point were considered formed. Voxels that were present at  
134 both time points were considered as quiescent bone. By overlaying the images, morphometrical  
135 analysis of bone formation and resorption sites within the trabecular region allowed calculations  
136 of bone formation rate (BFR), bone resorption rate (BRR), mineral apposition rate (MAR),  
137 mineral resorption rate (MRR), mineralizing surface (MS) and eroded surface (ES) [15].

## 138 **Quantification of the clinical mouse frailty index (FI)**

139 As recommended in the recently established toolbox for the longitudinal assessment of  
140 healthspan in aging mice [38], frailty was quantified using the clinical mouse FI [39], which  
141 includes the assessment of 31 non-invasive clinical items. For 29 of these items, mice were  
142 given a score of 0 if not present, 0.5 if there was a mild deficit, and 1 for a severe deficit. The  
143 final two items were weight and body surface temperature, which were scored based on the  
144 number of standard deviations from a reference mean in young adult mice as previously  
145 described [39].



## 146 **Statistical analysis**

147 Data are represented as mean $\pm$ SD. For analysis of the longitudinal micro-CT images, frailty  
148 index and body weight measurements, linear mixed model analysis was performed using the  
149 lmerTEST package [40] in R (R Core Team (2019). R: A language and environment for  
150 statistical computing. R Foundation for Statistical Computing, Vienna, Austria). Fixed effects  
151 were allocated to age, genotype and group and a random effect was allocated to the individual  
152 mice to account for inherent variability between mice. Furthermore, an interaction effect  
153 between age and genotype as well as between genotype and groups were assessed. For the  
154 comparison of the bone morphometric parameters, frailty index and body weights at 40 weeks  
155 of age, values of the individual mice are shown. Effects of genotype and imaging group were  
156 analyzed via two-way ANOVA followed by Tukey's multiple comparison test or one-way  
157 ANOVA, respectively using SPSS (IBM Corp. Released 2016. IBM SPSS Statistics for  
158 Windows, Version 24.0. Armonk, NY, USA). Power analysis was performed in G\*Power  
159 (G\*Power, Version 3.1.3., Düsseldorf, Germany [41]) and in R (R Core Team (2019). R: A  
160 language and environment for statistical computing. R Foundation for Statistical Computing,  
161 Vienna, Austria).

## 162 **Results**

### 163 **Effect of genotype on bone morphometry and frailty**

164 Fig 2 shows the changes in static bone morphometric parameters over time in the different  
165 imaging groups obtained by longitudinal *in vivo* micro-CT imaging. Taking all the longitudinal  
166 micro-CT measurements of the different groups into account, PolgA had lower bone volume  
167 fraction (BV/TV, -10%,  $p < 0.0001$ ), trabecular thickness (Tb.Th, -6%,  $p < 0.0001$ ), cortical area  
168 fraction (Ct.Ar/Tt.Ar, -6%,  $p < 0.0001$ ) and cortical thickness (Ct.Th, -5%,  $p < 0.0001$ ) compared

169 to WT (Fig 2A-D). The trabecular number (Tb.N) and trabecular spacing (Tb.Sp) were not  
170 significantly different between genotypes ( $p > 0.05$ ). Furthermore, the age-related changes in  
171 bone morphometric parameters developed differently between genotypes with a significant  
172 interaction effect between age and genotype for BV/TV, Tb.Th, Ct.Ar/Tt.Ar and Ct.Th  
173 ( $p < 0.0001$ , Fig 2). While BV/TV, trabecular thickness (Tb.Th), Ct.Ar/Tt.Ar and cortical  
174 thickness (Ct.Th) initially increased in both genotypes, the increase in these parameters ceased  
175 to continue in PolgA mice from 30-32 weeks onwards (Fig 2A-D).

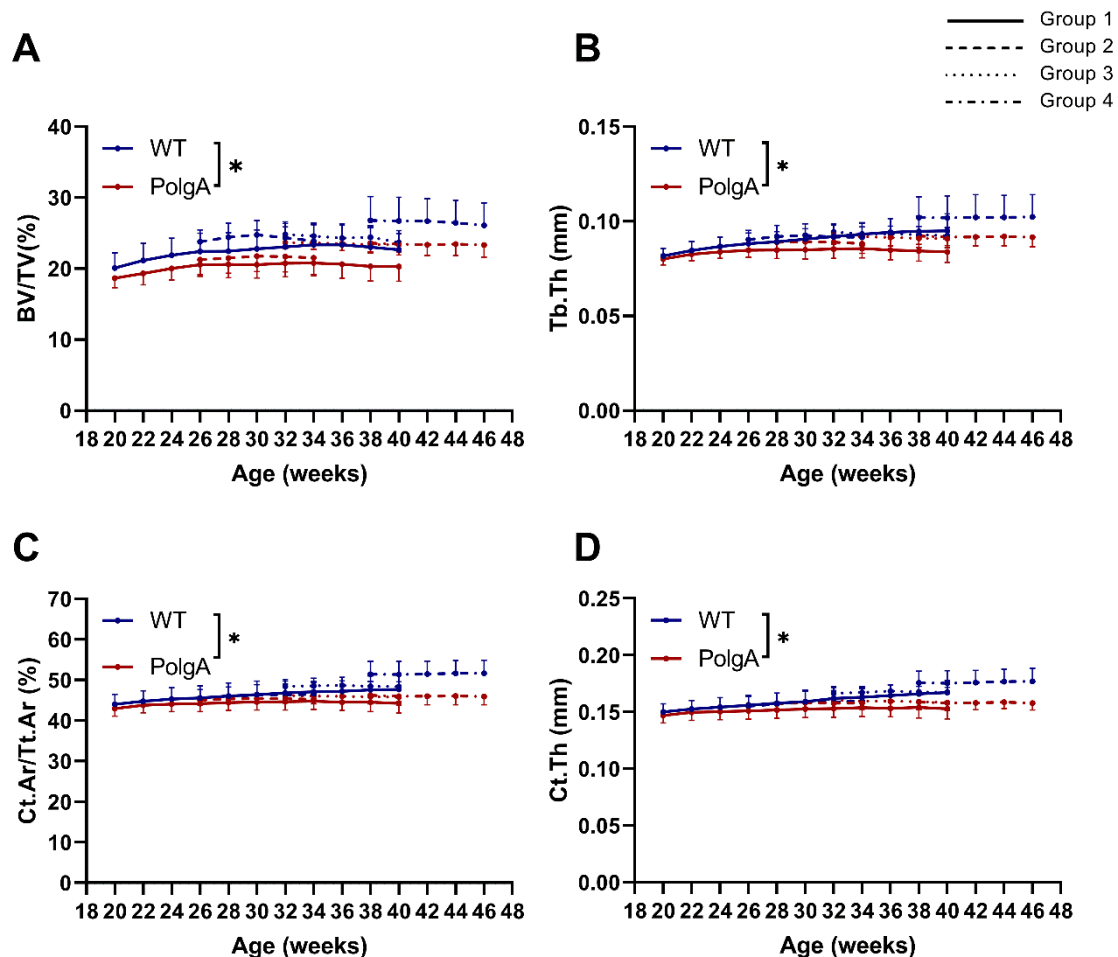

176

177 **Fig 2 Static bone morphometric parameters obtained by longitudinal *in vivo* micro-CT**  
178 **monitoring of the 6<sup>th</sup> caudal vertebrae between 20 and 46 weeks of age.**

179 (A) Bone volume fraction (BV/TV), (B) trabecular thickness (Tb.Th), (C) cortical area fraction  
180 (Ct.Ar/Tt.Ar) and (D) cortical thickness (Ct.Th). (\*  $p < 0.05$  PolgA (red lines) vs WT (blue lines))

181 determined by linear mixed model. The different patterns represent different groups of mice  
182 scanned at different time-points)

183 By registering consecutive time-lapsed *in vivo* micro-CT images onto one-another [15], we  
184 furthermore assessed the dynamic remodeling activities in PolgA and WT mice. On average,  
185 PolgA mice had significantly lower bone formation rate (BFR, -27%,  $p=0.001$ ) and bone  
186 resorption rate (BRR, -24%,  $p=0.001$ ) compared to WT (Fig 3A,B). BFR did not develop  
187 differently between genotypes, whereas there was a significant interaction effect between age  
188 and genotype for BRR ( $p=0.014$ ). Mineral apposition (MAR) and resorption rate (MRR), which  
189 represent the thickness of formation and resorption packages, were lower (-9%,  $p=0.0013$  and  
190 -18%,  $p<0.0001$ ) in PolgA mice compared to WT (Fig 3C,D). While MAR did not develop  
191 differently between genotypes, MRR increased in WT but remained constant in PolgA mice,  
192 thus leading to a significant interaction effect between age and genotype for MRR ( $p<0.001$ ).  
193 The mineralized surface (MS), which represents the surfaces of formation sites was lower (-  
194 13%,  $p<0.0001$ ) in PolgA mice compared to WT whereas ES was similar between genotypes  
195 ( $p>0.05$ , Fig 3E,F). Neither MS nor ES showed an interaction effect between age and genotype  
196 ( $p>0.05$ ). Overall, these results suggest that PolgA mice have lower bone remodeling activities  
197 compared to WT.

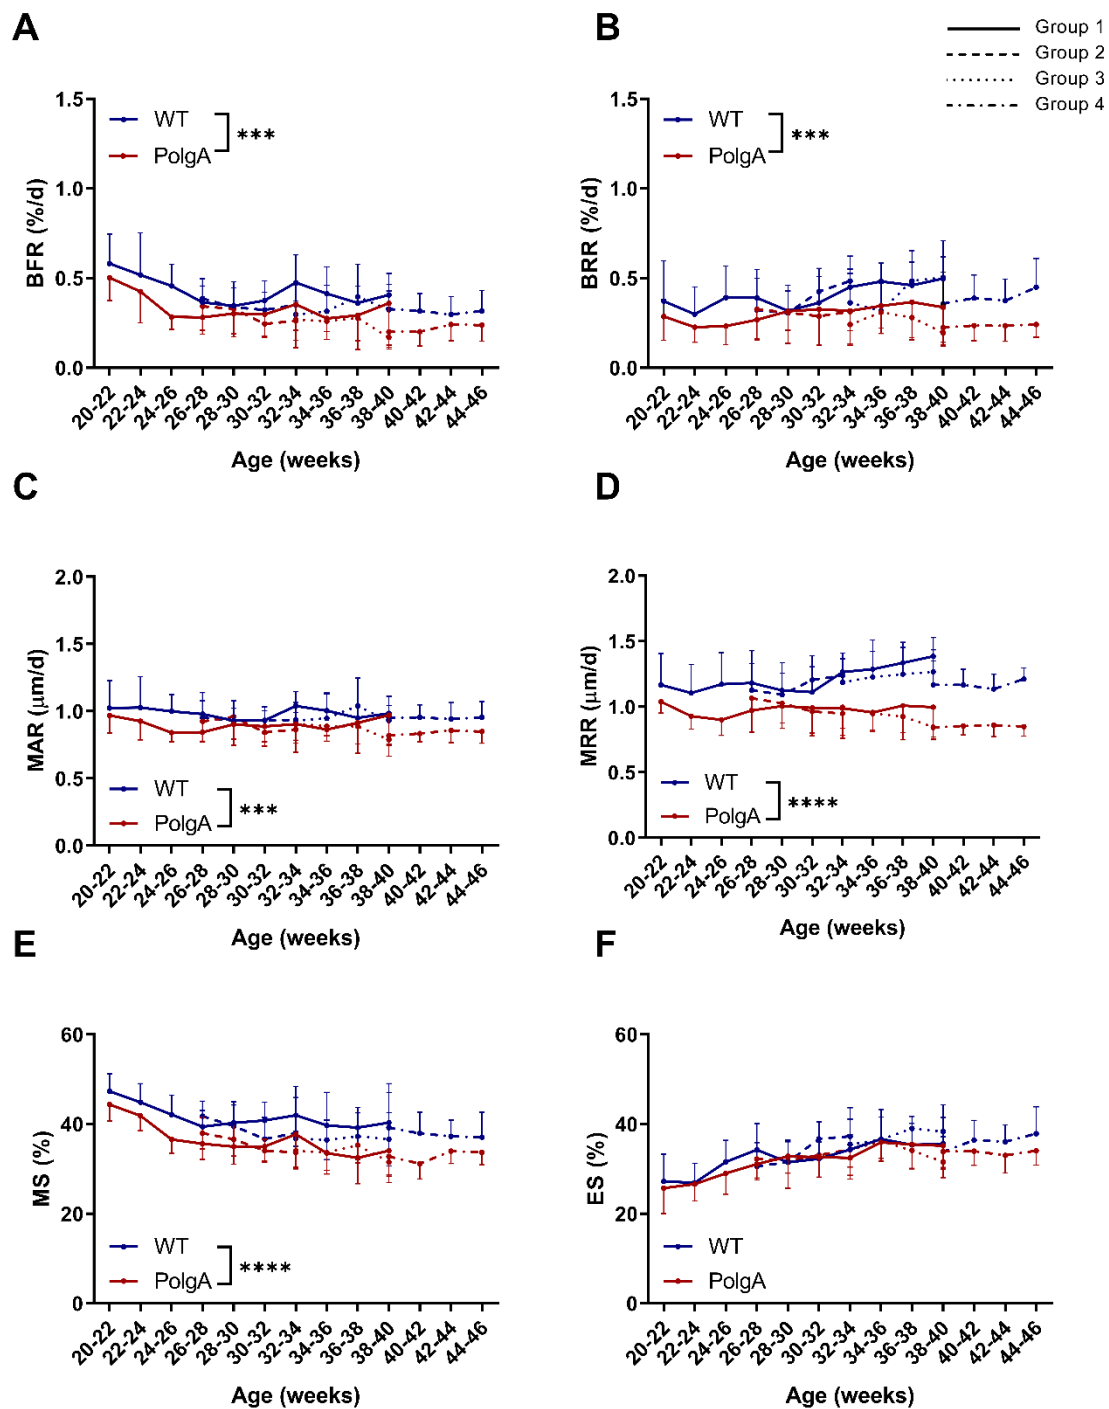

198

199 **Fig 3 Dynamic bone morphometric parameters obtained by longitudinal *in vivo***  
 200 **monitoring of the 6<sup>th</sup> caudal vertebrae between 20 and 46 weeks of age.**

201 (A) Bone formation rate (BFR), (B) bone resorption rate (BRR), (C) mineral apposition rate  
 202 (MAR), (D) mineral resorption rate (MRR), (E) mineralizing surface (MS) and (F) eroded  
 203 surface (ES). (\*  $p < 0.05$  PolgA (red lines) vs WT (blue lines) determined by linear mixed model.  
 204 The different line patterns represent different groups of mice scanned at different time-points)

205 Fig 4 shows the changes in clinical mouse frailty index (FI) and body weights of PolgA and  
206 WT mice in the different imaging groups. In line with the known accelerated aging phenotype  
207 of PolgA mice [36, 37], longitudinal assessments of the FI showed that the mean FI averaged over  
208 all time-points was significantly higher in PolgA (+98%,  $p < 0.0001$ ) compared to WT (Fig 4A).  
209 Furthermore, the FI developed differently with age in PolgA mice compared to WT (interaction effect  
210 between age and genotype,  $p < 0.0001$ , Fig 4A). While PolgA and WT mice had similar FI scores at 34  
211 weeks, PolgA mice continuously accumulated health deficits (i.e., graying, ruffled fur, distended  
212 abdomen) with age leading to higher FI scores compared to WT from 38 weeks onwards. Conversely,  
213 the body weight continuously increased in both genotypes, with no differences detected between  
214 genotypes ( $p > 0.05$ , Fig 4B).

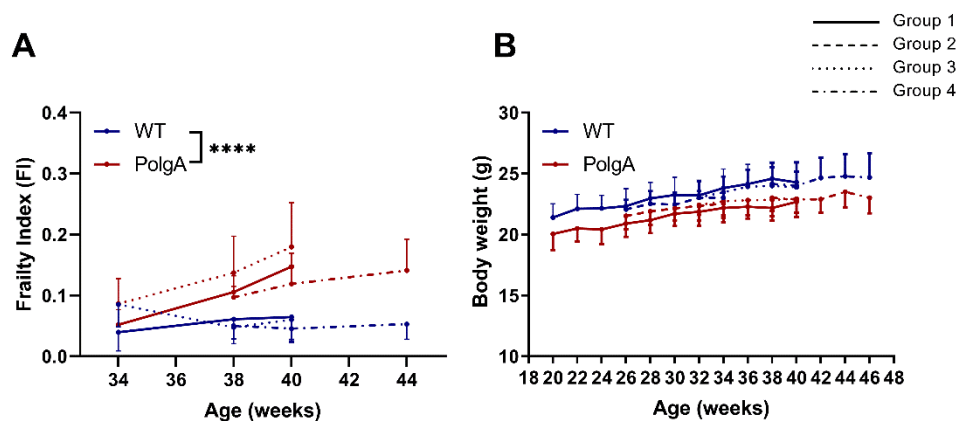

215

216 **Fig 4 Longitudinal quantification of the (A) frailty index (FI) and (B) body weight in PolgA**  
217 **and WT mice between 20 and 46 weeks of age.**

218 (\*\*\*\*  $p < 0.0001$  PolgA (red lines) vs WT (blue lines) determined by linear mixed model. The  
219 different line patterns represent different groups of mice scanned at different time-points).

## 220 **Effect of *in vivo* micro-CT imaging on bone morphometry and frailty**

221 In order to address whether the cumulative effects of radiation, anesthesia and handling  
222 associated with long-term *in vivo* micro-CT imaging influenced the bone phenotype of PolgA  
223 and WT mice, linear regression analysis was performed on the static and dynamic parameters of  
224 all four groups (see study design illustrated in Fig 1). As is already visually evident in Fig 2,

225 there was a considerable heterogeneity in static bone morphometric parameters between the  
226 different groups. Compared to the first group which was scanned over 20 weeks, the fourth group  
227 showed higher BV/TV ( $p < 0.001$ ) and Tb.Th ( $p = 0.003$ , Fig 2A,B), along with higher Tb.N  
228 ( $p = 0.002$ ) and lower Tb.Sp ( $p < 0.0001$ ). With respect to the cortical bone, the fourth group also  
229 showed higher Ct.Ar/Tt.Ar ( $p < 0.0001$ ) and Ct.Th ( $p = 0.005$ ) compared to the first group.  
230 However, none of the morphometric parameters showed a significant interaction effect between  
231 genotype and group.

232 The differences between groups observed in the dynamic morphometric parameters were less  
233 pronounced than in the static morphometric parameters. Averaged over all time-points, a  
234 significant effect of group was only found for BFR ( $p = 0.007$ ), BRR ( $p = 0.01$ ) and MRR ( $p = 0.01$ ,  
235 Fig 3A,B,D). Post-hoc analysis between groups showed that WT mice of the fourth group had  
236 significantly lower BRR ( $p = 0.029$ ) and MRR ( $p = 0.025$ ) compared to WT of the first group, thus  
237 explaining the higher BV/TV and Tb.Th observed in that group. Similar to the static  
238 morphometric parameters, no significant interaction effects between genotype and age were  
239 found for any of the parameters. Linear regression analysis of the longitudinal measurements of  
240 FI and body weights did not show any differences between imaging groups ( $p > 0.05$ , Fig 4A,B).

### 241 **Effect of imaging session number on bone morphometry and frailty**

242 In addition to evaluating the longitudinal data, the bone morphometric parameters and FI of the  
243 different imaging groups were cross-sectionally compared at 40 weeks of age, i.e. the time-point  
244 at which the different groups had received either 11 scans, 5 scans or 2 scans, respectively (Figs  
245 5 and 6). Both genotype and imaging group significantly affected BV/TV, Tb.Th, Ct.Ar/Tt.Ar  
246 and Ct.Th (Fig 5A-D and Table S1 for  $p$ -values and effect sizes  $f$ ), however none of the  
247 parameters showed a significant interaction effect between genotype and group. On average,  
248 PolgA mice had lower BV/TV (-8.2%,  $p = 0.001$ ), Tb.Th (-7.9%,  $p < 0.0001$ ), Ct.Ar/Tt.Ar (-7.8%,

249  $p < 0.0001$ ) and Ct.Th (-8%,  $p < 0.0001$ ) compared to WT. Furthermore, for Tb.Th, Ct.Ar/Tt.Ar  
250 and Ct.Th, the effect of genotype was 1.3, 1.75 and 2.5 fold stronger than the effect of imaging  
251 session number (group) as shown by the higher effect sizes  $f$  determined by two-way ANOVA  
252 analysis (Table S1). Conversely, for BV/TV, the effect of imaging session number was 1.48 fold  
253 stronger compared to the effect of genotype. Post-hoc analysis within genotypes showed that  
254 WT mice of the 11-scan group had lower BV/TV ( $p = 0.008$ ) and Ct.Ar/Tt.Ar ( $p = 0.032$ )  
255 compared to those of the 2-scan group (Fig 5A,C). Similar to WT mice, PolgA of the 11-scan  
256 group showed lower BV/TV ( $p < 0.0001$ ) and lower Tb.Th ( $p = 0.005$  and  $p = 0.002$ ) compared to  
257 the 5- and 2-scan groups, with no differences between imaging groups detected in the cortical  
258 morphometric parameters (Fig 5B-D).

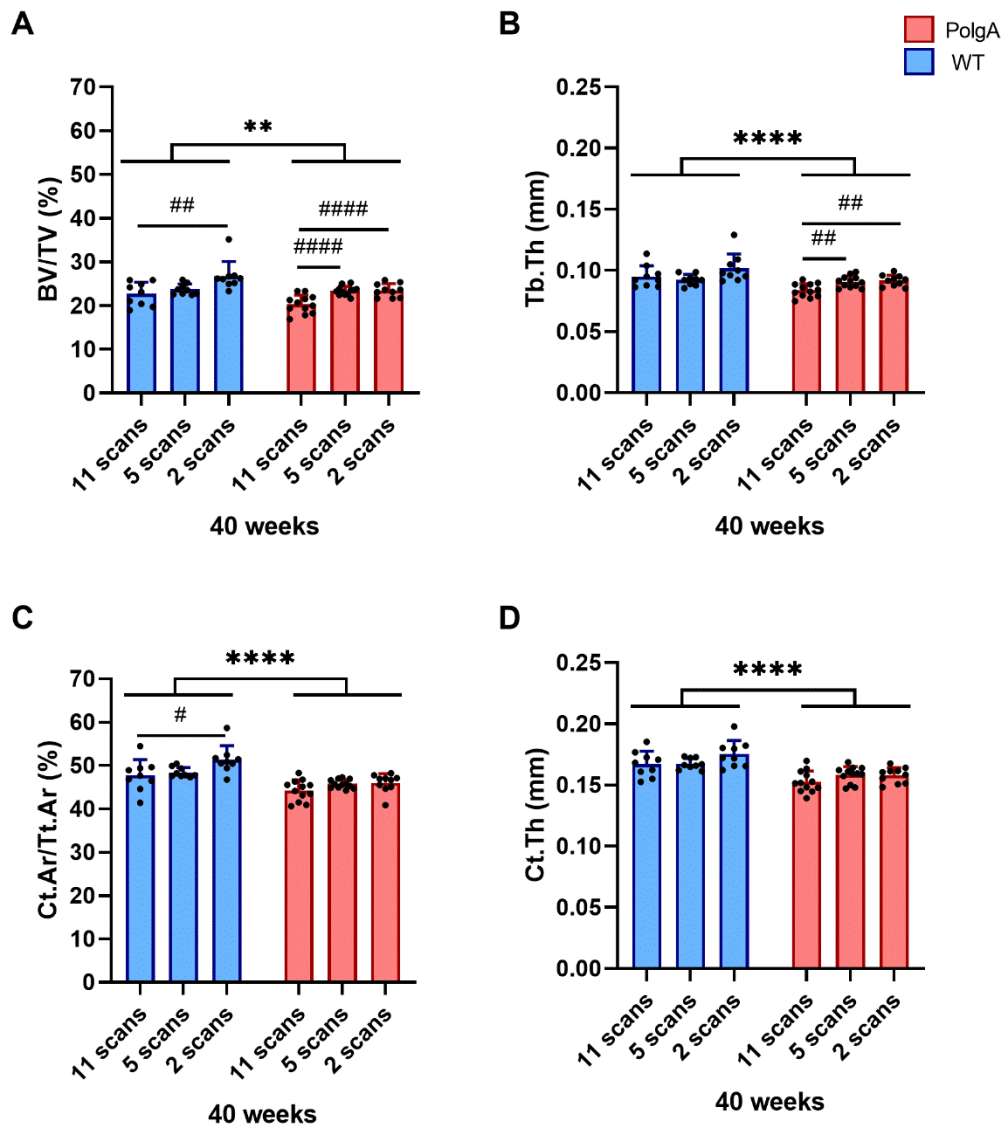

259

260 **Fig 5 Static bone morphometric parameters at 40 weeks of age for the different groups**  
 261 **having received either 11 scans, 5 scans or 2 scans, respectively.**

262 (A) bone volume fraction (BV/TV), (B) trabecular thickness (Tb.Th), (C) cortical area fraction  
 263 (Ct.Ar/Tt.Ar), (D) cortical thickness (Ct.Th). \*\*  $p < 0.01$  and \*\*\*\*  $p < 0.0001$  between genotypes  
 264 determined by two-way ANOVA, #  $p < 0.05$ , ##  $p < 0.01$  and ####  $p < 0.0001$  post-hoc test within  
 265 genotypes determined by one-way ANOVA and Tukey's multiple comparisons test.

266 With respect to the dynamic parameters, both genotype and imaging session number  
 267 significantly affected BFR, BRR and MRR (Fig 6A,B,D and Table S1 for p-values and effect  
 268 sizes  $f$ ), however none of the parameters showed a significant interaction effect between  
 269 genotype and imaging session number. On average, PolgA mice had lower BFR (-30.8%,



270 p=0.005), BRR (-41.9%, p<0.0001), MAR (-10%, p=0.029 and MRR (-29.7%, p<0.0001)  
271 compared to WT. Furthermore, for BRR and MRR, the effect of genotype was 1.3 and 2.4 fold  
272 stronger than the effect of imaging session number as shown by the higher effect sizes *f*  
273 determined by two-way ANOVA analysis (Table S1). Conversely, for BFR and MAR, the effect  
274 of imaging session number was 1.1 fold stronger compared to the effect of genotype.  
275 Furthermore, WT mice of the 11-scan group had higher MRR compared to WT mice of the 2-  
276 scan group (p=0.026, Fig 6H). PolgA mice of the 11-scan group had higher BFR (p=0.019) and  
277 BRR (p=0.022) compared to PolgA mice of the 5-scan group (Fig 6E,F), whereas no differences  
278 were observed between 11- and 2-scan group, respectively.

279

280

281

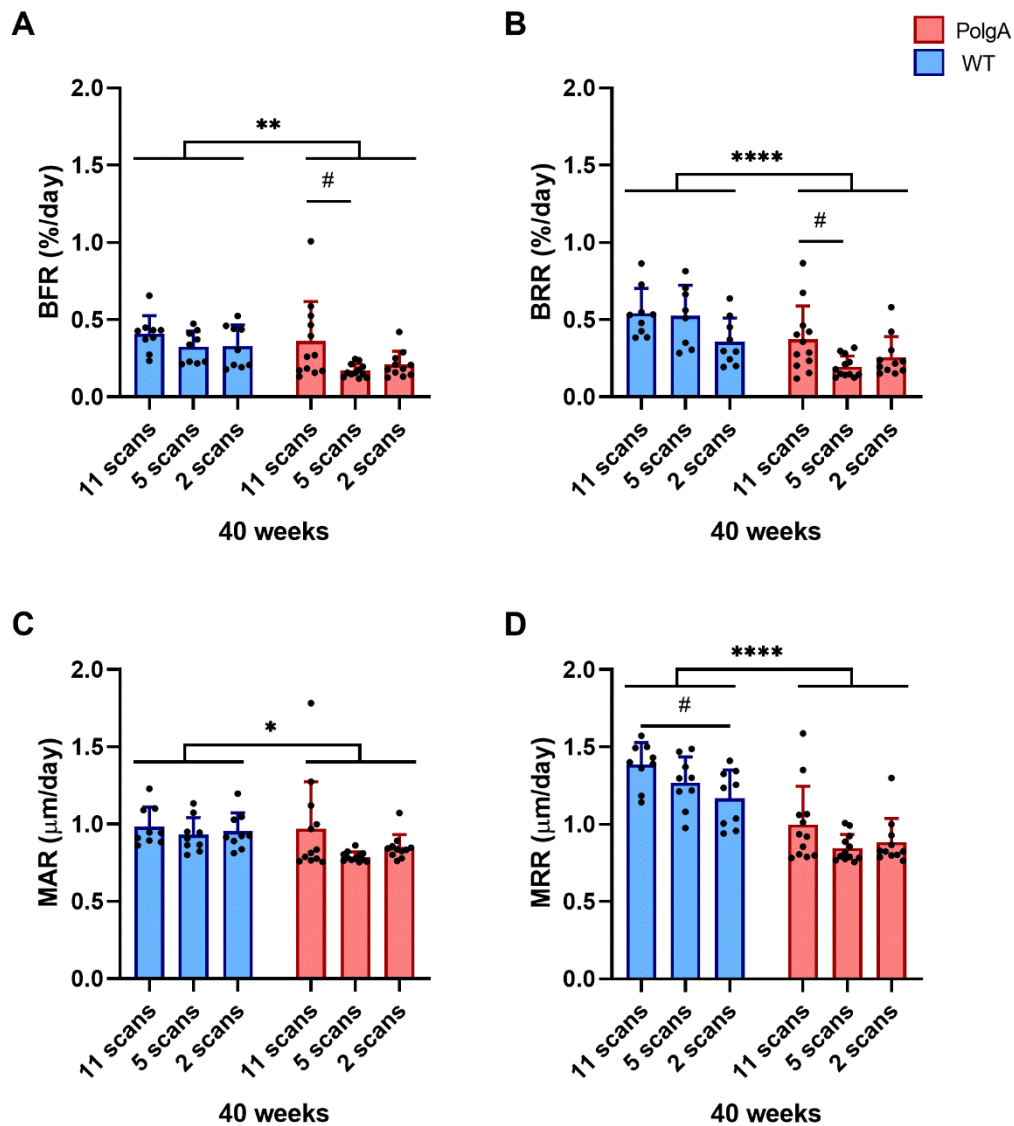

282

283 **Fig 6 Dynamic bone morphometric parameters at 40 weeks of age for the different groups**  
284 **having received either 11 scans, 5 scans or 2 scans, respectively.**

285 (A) Bone formation rate (BFR), (B) bone resorption rate (BRR), (C) mineral apposition rate,  
286 (D) mineral resorption rate (MRR). \*  $p < 0.05$ , \*\*  $p < 0.01$  and \*\*\*\*  $p < 0.0001$  between genotypes  
287 determined by two-way ANOVA, #  $p < 0.05$ , post-hoc test within genotypes determined by one-  
288 way ANOVA and Tukey's multiple comparisons test.

289 At 40 weeks of age, PolgA mice had significantly higher FI compared to WT (+ 166%,  
290  $p < 0.0001$ , Fig 7A). The comparison between imaging groups showed that PolgA mice in the 5-  
291 scan group had significantly higher FI scores compared to PolgA mice of the 2-scan group

292 (p=0.019). No significant differences between genotypes or scanning groups were detected for  
293 the body weight at 40 weeks of age (Fig 7B).

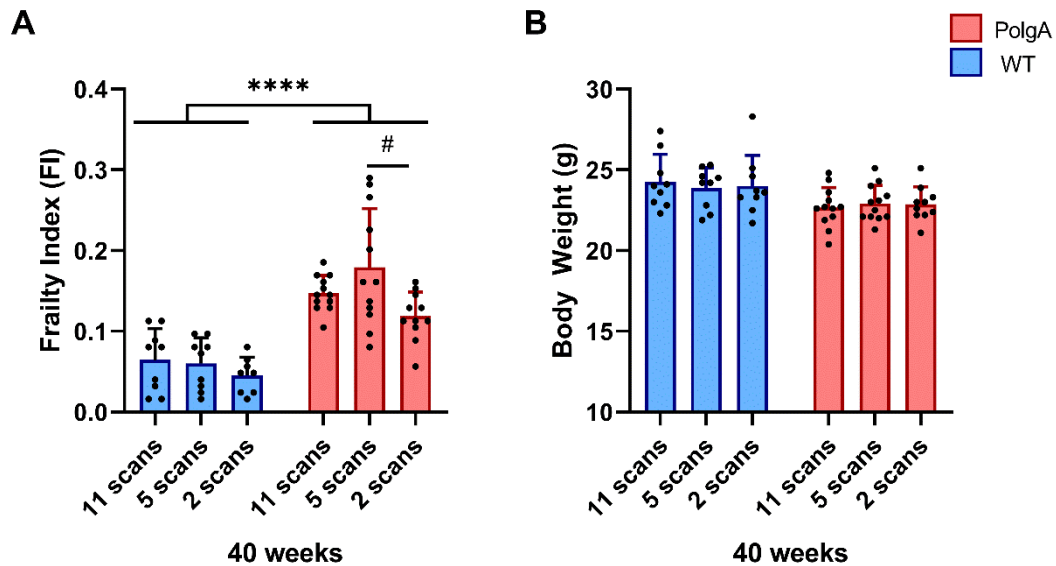

294  
295 **Fig 7 Comparison of (A) FI and (B) body weights at 40 weeks of age in PolgA (red bars)**  
296 **and WT (blue bars) mice. (\*\*\*\*p<0.0001 between genotypes and #p<0.05 determined by**  
297 **post-hoc one-way ANOVA and Tukey's multiple comparisons test).**

298 Considering the small sample sizes (n=9 per group in WT and n=12 per group in PolgA) used  
299 for this cross-sectional comparison between scanning groups, the achieved power of the analysis  
300 was computed given the obtained effect sizes (*f*) and alpha level of 0.05 (Table S2). While  
301 sufficient power ( $\geq 0.8$ ) was achieved to detect any effects that might have existed in the  
302 trabecular morphometric parameters, the power for detecting differences in the cortical as well  
303 as dynamic morphometric parameters was not sufficient, suggesting that a higher number of  
304 samples would be required to detect any differences between scanning groups. Conversely, by  
305 performing a longitudinal comparison (paired t-test between parameters of individual WT and  
306 PolgA mice measured both at 20 and 40 weeks of age), sufficient power (power  $\geq 0.8$ ) was  
307 obtained for all static morphometric parameters. Nevertheless, as the dynamic bone  
308 morphometric parameters in PolgA mice remained relatively constant between 20 and 40 weeks

309 of age, the effect sizes were small and hence, higher samples sizes would be beneficial to detect  
310 differences in dynamic bone morphometric parameters over time in individual mice.

## 311 **Discussion**

312 Inspired by a previous study, which characterized the bone phenotype and the development of  
313 frailty in the PolgA mouse model [34, 35], this study assessed the impact of long-term *in vivo*  
314 micro-CT imaging on hallmarks of osteopenia and frailty in individual mice during the process  
315 of aging. The unique study design, for which a large cohort of animals was aged in parallel up  
316 to 46 weeks of age, provided the possibility not only for cross-sectional comparisons between  
317 genotypes and between imaging groups (i.e., that were scanned at different time-points) but  
318 also for longitudinal comparisons within individual animals (i.e., that were scanned both at  
319 young and old age).

320 In agreement with previous studies of cross-sectional [36, 37, 42] and longitudinal designs [34,  
321 35], PolgA and WT had similar bone morphometric parameters at 20 weeks of age, which then  
322 diverged over time such that PolgA had significantly lower bone volume and quality at 40 weeks  
323 of age. Concomitantly, PolgA accumulated multiple health deficits over time (e.g., graying,  
324 ruffled fur, distended abdomen, kyphosis) leading to a significantly higher FI in PolgA mice  
325 from 38 weeks onwards. The clear difference in the bone morphometric parameters and FI  
326 between genotypes was observed both when groups were cross-sectionally compared and when  
327 individual mice were monitored over time. Interestingly though, *in vivo* micro-CT imaging over  
328 20 weeks showed that this difference in bone micro-architecture was not due to bone loss in  
329 PolgA mice, but rather in the inability to reach peak bone mass, of which a more comprehensive  
330 description has been provided elsewhere [34, 35]. Interestingly, the registration of consecutive  
331 micro-CT images revealed that PolgA mice had lower bone remodeling activities compared to

332 WT as shown by reduced bone formation and resorption rates, with no differences in the net  
333 remodeling rate. Similarly, senile osteoporosis in humans is characterized by low bone  
334 turnover, as opposed to the high bone turnover rates (higher resorption activities) observed  
335 during postmenopausal osteoporosis [43-45].

336 The comparison between different imaging groups revealed a considerable heterogeneity  
337 between groups with the fourth group having higher trabecular and cortical bone morphometric  
338 parameters compared to the other groups. However, we did not observe an interaction effect  
339 between genotype and imaging groups, suggesting that the PolgA mutation does not render  
340 bone more or less susceptible to cumulative effects of radiation, anesthesia and handling  
341 associated with *in vivo* micro-CT imaging. Hence, the comparison between two genotypes  
342 remains valid despite the potential confounding effects of more frequent *in vivo* micro-CT  
343 imaging sessions. Furthermore, with the exception of BV/TV, the effect of genotype on static  
344 bone morphometric parameters was larger than the effect of repeated *in vivo* micro-CT imaging.  
345 That *in vivo* micro-CT imaging associated effects on bone morphometric parameters are  
346 stronger in trabecular bone compared to cortical bone has previously been shown [24]. In that  
347 study, the tibiae of sham- and ovariectomized-C57Bl/6J mice showed lower trabecular bone  
348 volume compared to the contralateral non-irradiated limbs, whereas this effect was not observed  
349 in healthy untreated 8- to 10-week-old control C57Bl/6J mice [24]. In line with our study, no  
350 interaction effect between ovariectomy and *in vivo* micro-CT imaging was found. This suggests  
351 that despite small but significant effects of *in vivo* micro-CT imaging on bone morphometric  
352 parameters, the comparison between different study groups/treatments remains valid. Willie et  
353 al. have also reported lower BV/TV in 10-week-old C57BL/6J mice subjected to multiple *in*  
354 *vivo* micro-CT scans compared to age-matched mice subjected to only one *in vivo* micro-CT  
355 scan [20]; however, this effect was not observed in 26-week old mice, suggesting that imaging

356 associated effects are stronger in younger mice. Conversely, other studies have reported no  
357 imaging associated effects on bone morphometric parameters in mice ranging from pre-pubertal  
358 to adult age [25] up to late adulthood (48 weeks) [29]. Using the same micro-CT settings as in  
359 the present study, we have previously shown that five scans did not have an effect on the bone  
360 microstructure or bone remodeling rates in the caudal vertebrae of 15-week-old C57BL/6 mice  
361 [17, 33]. More recently, we have furthermore used a similar *in vivo* micro-CT approach to  
362 monitor specific healing phases after osteotomy and did not observe any significant imaging-  
363 associated changes in bone volume and turnover in the fracture callus of mice after 7 scans [30].  
364 In the present study, the comparison between groups at 40 weeks of age showed that the PolgA  
365 mice that were subjected to 11 imaging sessions had lower trabecular bone morphometric  
366 parameters compared to those subjected to 5 and 2 sessions, respectively, while no differences  
367 between any of the groups were detected in the cortical bone. For the WT mice, the group  
368 subjected to 2 imaging sessions showed higher BV/TV and Ct.Ar/Tt.Ar compared to those  
369 subjected to 11 sessions, while no significant differences between 11 and 5 imaging sessions  
370 were found. Hence, although effects associated with multiple time-lapsed micro-CT scans seem  
371 to be present when compared to a very low number of 2 imaging sessions, there does not seem  
372 to be major differences between performing 5 or 11 sessions. Furthermore, although small but  
373 significant effects were observed between imaging groups in the static bone morphometric  
374 parameters, the differences between groups were less pronounced in the dynamic remodeling  
375 parameters. Taking all the longitudinal data into account, no differences between groups were  
376 observed for the parameters associated with bone formation. For parameters associated with  
377 bone resorption, the WT mice of the first group showed higher BRR and MRR compared to the  
378 fourth group. When the groups were compared at 40 weeks of age (having received either 11  
379 or 2 imaging sessions, respectively), the 11-scan group showed higher MRR compared to the

380 2-scan group, suggesting a potential imaging-induced increase in osteoclast activity. An  
381 increased number and activity of osteoclasts has previously been reported in C57Bl/6 mice  
382 subjected to whole-body irradiation with an X-ray dosage of 2Gy [46], however, as *in vivo*  
383 micro-CT imaging is localized to the scanned area, these results are not directly comparable to  
384 whole-body irradiation. One study using *in vivo* micro-CT showed dose-dependent effects on  
385 bone formation and resorption activities; while 3 consecutive scans at a high dose (776 mGy)  
386 resulted in increased bone resorption but no differences in bone formation in the tibiae of 10-  
387 week-old C57Bl/6J mice, no effects were observed when scanning at a lower dose (434mGy)  
388 [25]. In line with these results obtained *in vivo*, scanning at the lower dose did not affect the  
389 osteogenic differentiation of bone marrow osteoprogenitors as well as osteoclast formation  
390 from bone marrow osteoclast precursors *in vitro* [25]. Although the dose used in the current  
391 study (640 mGy) lies in between the two doses reported previously, caudal vertebrae – which  
392 predominantly contain yellow (fatty) bone marrow – should be less sensitive to radiation  
393 compared to long bones, which predominantly contain red bone marrow [47, 48]. Nevertheless,  
394 owing to the low statistical power achieved in the cross-sectional comparison between imaging  
395 groups, further studies with higher animal numbers would be necessary to detect cumulative  
396 effects of long-term *in vivo* micro-CT imaging on dynamic bone morphometric parameters.

397 There are several limitations to this study. Firstly, we do not have baseline measurements of all  
398 mice at 20 weeks of age, making it impossible to know whether the differences observed  
399 between imaging groups were due to repeated micro-CT imaging or due to initial variation  
400 between animals. In this respect, we observed that longitudinal designs including baseline  
401 measurements already at young age are more powerful at detecting age-related phenotypic  
402 changes compared to those including multiple groups with fewer imaging sessions. Hence,  
403 although sample sizes of 10-12 animals per group are sufficient for longitudinal studies, higher

404 animal numbers would be beneficial for cross-sectional comparisons of aging mice. A second  
405 limitation of this study was the inability to single out the effects of radiation, anesthesia and  
406 handling, respectively as the main factor influencing bone morphometric parameters, as more  
407 frequent imaging sessions comprise more frequent anesthesia and handling as well as more  
408 frequent fixation in the mouse holder used for imaging. Therefore, in order to rule out potential  
409 harmful effects of the imaging procedure, future studies should include a control group,  
410 receiving a baseline and end-point *in vivo* scan as well as sham-scans for the rest of the  
411 measurements. Indeed, a previous study, which included sham-scanning did not observe any  
412 imaging associated effects on the bone micro-architecture and cell viability of bone marrow  
413 cells in aged rat tibiae subjected to 8 weekly scans [27]. Lastly, although this study assessed the  
414 effects of long-term *in vivo* micro-CT imaging on bone remodeling activities, thereby providing  
415 indirect information on cellular activities and recruitment, potential damaging effects of this  
416 longitudinal micro-CT imaging approach were not assessed at the cellular level. Future studies  
417 should therefore include analyses of gene and protein expression in response to long-term *in*  
418 *vivo* micro-CT imaging.

419 Interestingly, the heterogeneity in bone morphometry observed between imaging groups was  
420 not present for the FI measurements. At 40 weeks of age, the PolgA mice of the 5-scan group  
421 had significantly higher FI scores compared to those of the 2 scan group; however, as no  
422 differences were detected between the 11- and 2-scan groups, we expect that this difference  
423 was related to variation between animals rather than to the cumulative effects of radiation and  
424 anesthesia associated with *in vivo* micro-CT imaging. The imaging groups did not show any  
425 differences in body weights, which increased over time both in PolgA and WT mice. The  
426 absence of weight loss further supports the fact that the well-being of the animals was not  
427 negatively affected by the higher number of *in vivo* micro-CT scans in the first group, compared



428 to groups 2,3 and 4, respectively. These results demonstrate how the parallel tracking of the FI  
429 as an addition to longitudinal *in vivo* micro-CT imaging not only allows to link age-related  
430 changes in bone morphometry to the development of frailty but also provides a useful tool to  
431 assess whether treatments/interventions have biasing effects on the overall health status of the  
432 animals. By maximizing the data obtained from individual animals, the total number of animals  
433 can be reduced. Based on the results of this study, we therefore recommend that in addition to  
434 acquiring baseline measurements of body weight and of the bone micro-architecture, baseline  
435 FI measurements should be included for studies in aging mice. Stratifying the animals according  
436 to these initial measurements could also be highly valuable to reduce the variability between  
437 study groups.

438 In conclusion, the combination of the longitudinal assessments of the FI and time-lapsed *in vivo*  
439 micro-CT imaging allowed for the detection of hallmarks of osteopenia and aging across  
440 multiple systems. Although the long-term monitoring approach can potentially lead to small  
441 but significant changes in bone morphometric parameters, the comparison between genotypes  
442 was not impaired. Moreover, more frequent *in vivo* micro-CT imaging did not negatively affect  
443 the multi-system hallmarks of aging such as body weight and frailty index. In line with the goal  
444 of “Reduction”, the second principle of the 3R’s, long-term *in vivo* micro-CT imaging allows to  
445 reduce the number of animals required for experiments while maintaining sufficient statistical  
446 power to reach a valid conclusion and thus, provides a powerful tool for usage in aging studies.

## 447 **Acknowledgements**

448 The authors gratefully acknowledge valuable inputs from Dr. Ilaria Bellantuono concerning the  
449 establishment of the frailty index at the institute for biomechanics. This manuscript is based  
450 upon work supported by the European Cooperation in Science and Technology (COST Action

451 BM1402: MouseAGE) and the European Research Council (ERC Advanced MechAGE ERC-  
452 2016-ADG-741883).

## 453 **Conflict of Interest**

454 The authors declare no conflict of interest.

455

## 456 **References**

- 457 [1] Nations U, *World Population Ageing 2019 (ST/ESA/SER.A/444)*, Department of  
458 Economic and Social Affairs, Population Division. [www.unpopulation.org](http://www.unpopulation.org), 2020: New  
459 York, USA.
- 460 [2] Clegg A, Young J, Iliffe S, Rikkert MO, Rockwood K. Frailty in elderly people. *Lancet*  
461 (London, England), 2013; 381(9868):752-762.
- 462 [3] I. Bellantuono RD, D. Ehninger, A. Fernandes, S. E. Howlett, R. Müller, P. Potter, T.  
463 Tchkonja, A.-U. Trendelenburg, J. L. Trejo, R. Vandenbroucke, R. van Os, N. van Riel.  
464 Find drugs that delay many diseases of old age. *Nature*, 2018; 554:293-295.
- 465 [4] Fried LP, Tangen CM, Walston J, Newman AB, Hirsch C, Gottdiener J, Seeman T,  
466 Tracy R, Kop WJ, Burke G, McBurnie MA, Collabor CHS. Frailty in older adults:  
467 evidence for a phenotype. *J Gerontol A Biol Sci Med Sci*, 2001; 56(3):M146-M156.
- 468 [5] Jones DM, Song XW, Rockwood K. Operationalizing a frailty index from a  
469 standardized comprehensive geriatric assessment. *J Am Geriatr Soc*, 2004;  
470 52(11):1929-1933.
- 471 [6] Kennedy CC, Ioannidis G, Rockwood K, Thabane L, Adachi JD, Kirkland S, Pickard  
472 LE, Papaioannou A. A Frailty Index predicts 10-year fracture risk in adults age 25 years  
473 and older: results from the Canadian Multicentre Osteoporosis Study (CaMos).  
474 *Osteoporos Int*, 2014; 25(12):2825-2832.
- 475 [7] Fang X, Shi J, Song X, Mitnitski A, Tang Z, Wang C, Yu P, Rockwood K. Frailty in  
476 relation to the risk of falls, fractures, and mortality in older Chinese adults: Results from  
477 the Beijing longitudinal study of aging. *J Nutr Health Aging*, 2012; 16(10):903-907.
- 478 [8] Ensrud KE, Ewing SK, Taylor BC, Fink HA, Stone KL, Cauley JA, Tracy JK, Hochberg  
479 MC, Rodondi N, Cawthon PM, for the Study of Osteoporotic Fractures Research G.

- 480 Frailty and risk of falls, fracture, and mortality in older women: the study of osteoporotic  
481 fractures. *J Gerontol A Biol Sci Med Sci*, 2007; 62(7):744-751.
- 482 [9] Li G, Thabane L, Papaioannou A, Ioannidis G, Levine MAH, Adachi JD. An overview  
483 of osteoporosis and frailty in the elderly. *BMC Musculoskel Dis*, 2017; 18(1):46.
- 484 [10] Kane AE, Hilmer SN, Mach J, Mitchell SJ, de Cabo R, Howlett SE. Animal models of  
485 frailty: current applications in clinical research. *Clin Interv Aging*, 2016; 11:1519-1529.
- 486 [11] von Zglinicki T, Varela-Nieto I, Brites D, Karagianni N, Ortolano S, Georgopoulos S,  
487 Cardoso AL, Novella S, Lepperdinger G, Trendelenburg A-U, van Os R. Frailty in  
488 mouse ageing: A conceptual approach. *Mech Ageing Dev*, 2016; 160(Supplement  
489 C):34-40.
- 490 [12] Banga S, Heinze-Milne SD, Howlett SE. Rodent models of frailty and their application  
491 in preclinical research. *Mech Ageing Dev*, 2019; 179:1-10.
- 492 [13] Tremoleda JL, Khalil M, Gompels LL, Wylezinska-Arridge M, Vincent T, Gsell W.  
493 Imaging technologies for preclinical models of bone and joint disorders. *EJNMMI Res*,  
494 2011; 1(1):11-11.
- 495 [14] Dall'Ara E, Boudiffa M, Taylor C, Schug D, Fiegle E, Kennerley AJ, Damianou C,  
496 Tozer GM, Kiessling F, Müller R. Longitudinal imaging of the ageing mouse. *Mech*  
497 *Ageing Dev*, 2016; 160:93-116.
- 498 [15] Schulte FA, Lambers FM, Kuhn G, Müller R. In vivo micro-computed tomography  
499 allows direct three-dimensional quantification of both bone formation and bone  
500 resorption parameters using time-lapsed imaging. *Bone*, 2011; 48(3):433-442.
- 501 [16] Birkhold AI, Razi H, Duda GN, Weinkamer R, Checa S, Willie BM. Mineralizing  
502 surface is the main target of mechanical stimulation independent of age: 3D dynamic in  
503 vivo morphometry. *Bone*, 2014; 66:15-25.

- 504 [17] Lambers FM, Kuhn G, Weigt C, Koch KM, Schulte FA, Müller R. Bone adaptation to  
505 cyclic loading in murine caudal vertebrae is maintained with age and directly correlated  
506 to the local micromechanical environment. *J Biomech*, 2015; 48(6):1179-1187.
- 507 [18] Razi H, Birkhold AI, Zaslansky P, Weinkamer R, Duda GN, Willie BM, Checa S.  
508 Skeletal maturity leads to a reduction in the strain magnitudes induced within the bone:  
509 a murine tibia study. *Acta Biomaterialia*, 2015; 13:301-310.
- 510 [19] Levchuk A, Zwahlen A, Weigt C, Lambers FM, Badilatti SD, Schulte FA, Kuhn G,  
511 Muller R. The Clinical Biomechanics Award 2012 - presented by the European Society  
512 of Biomechanics: large scale simulations of trabecular bone adaptation to loading and  
513 treatment. *Clin Biomech (Bristol, Avon)*, 2014; 29(4):355-362.
- 514 [20] Willie BM, Birkhold AI, Razi H, Thiele T, Aido M, Kruck B, Schill A, Checa S, Main  
515 RP, Duda GN. Diminished response to in vivo mechanical loading in trabecular and not  
516 cortical bone in adulthood of female C57Bl/6 mice coincides with a reduction in  
517 deformation to load. *Bone*, 2013; 55(2):335-346.
- 518 [21] Yang H, Butz KD, Duffy D, Niebur GL, Nauman EA, Main RP. Characterization of  
519 cancellous and cortical bone strain in the in vivo mouse tibial loading model using  
520 microCT-based finite element analysis. *Bone*, 2014; 66:131-139.
- 521 [22] Hildebrandt IJ, Su H, Weber WA. Anesthesia and other considerations for in vivo  
522 imaging of small animals. *ILAR Journal*, 2008; 49(1):17-26.
- 523 [23] Hohlbaum K, Bert B, Dietze S, Palme R, Fink H, Thöne-Reineke C. Severity  
524 classification of repeated isoflurane anesthesia in C57Bl/6JRj mice - Assessing the  
525 degree of distress. *PloS One*, 2017; 12(6):e0179588.

- 526 [24] Klinck RJ, Campbell GM, Boyd SK. Radiation effects on bone architecture in mice and  
527 rats resulting from in vivo micro-computed tomography scanning. *Med Eng Phys*, 2008;  
528 30(7):888-895.
- 529 [25] Laperre K, Depypere M, van Gastel N, Torrekens S, Moermans K, Bogaerts R, Maes F,  
530 Carmeliet G. Development of micro-CT protocols for in vivo follow-up of mouse bone  
531 architecture without major radiation side effects. *Bone*, 2011; 49(4):613-622.
- 532 [26] Longo AB, Sacco SM, Salmon PL, Ward WE. Longitudinal use of micro-computed  
533 tomography does not alter microarchitecture of the proximal tibia in sham or  
534 ovariectomized sprague–dawley rats. *Calcif Tissue Int*, 2016; 98(6):631-641.
- 535 [27] Brouwers JEM, van Rietbergen B, Huiskes R. No effects of in vivo micro-CT radiation  
536 on structural parameters and bone marrow cells in proximal tibia of wistar rats detected  
537 after eight weekly scans. *J Orthop Res*, 2007; 25(10):1325-1332.
- 538 [28] Mustafy T, Benoit A, Londono I, Moldovan F, Villemure I. Can repeated in vivo micro-  
539 CT irradiation during adolescence alter bone microstructure, histomorphometry and  
540 longitudinal growth in a rodent model? *PloS One*, 2018; 13(11):e0207323-e0207323.
- 541 [29] Buie HR, Moore CP, Boyd SK. Postpubertal architectural developmental patterns differ  
542 between the L3 vertebra and proximal tibia in three inbred strains of mice. *J Bone Miner  
543 Res*, 2008; 23(12):2048-2059.
- 544 [30] Wehrle E, Tourolle né Betts DC, Kuhn GA, Scheuren AC, Hofmann S, Müller R.  
545 Evaluation of longitudinal time-lapsed in vivo micro-CT for monitoring fracture healing  
546 in mouse femur defect models. *Sci Rep*, 2019; 9(1):17445.
- 547 [31] Xu H, Lu BW, Zheng BJ, Tian J, Qi B, Deng YX, He ZZ, Su DS, Wang XR. Smaller  
548 sized inhaled anesthetics have more potency on Senescence-Accelerated Prone-8 mice  
549 compared with Senescence-Resistant-1 mice. *J Alzheimers Dis*, 2014; 39(1):29-34.

- 550 [32] Li XM, Su F, Ji MH, Zhang GF, Qiu LL, Jia M, Gao J, Xie ZC, Yang JJ. Disruption of  
551 hippocampal Neuregulin 1-ErbB4 signaling contributes to the hippocampus-dependent  
552 cognitive impairment induced by isoflurane in aged mice. *Anesthesiology*, 2014;  
553 121(1):79-88.
- 554 [33] Lambers FM, Schulte FA, Kuhn G, Webster DJ, Müller R. Mouse tail vertebrae adapt  
555 to cyclic mechanical loading by increasing bone formation rate and decreasing bone  
556 resorption rate as shown by time-lapsed in vivo imaging of dynamic bone morphometry.  
557 *Bone*, 2011; 49(6):1340-1350.
- 558 [34] Scheuren AC, Hulst G, Kuhn GA, Masschelein E, Wehrle E, De Bock K, Müller R.  
559 Hallmarks of frailty and osteosarcopenia in prematurely aged PolgA<sup>D257A/D257A</sup> mice.  
560 *bioRxiv*, 2020:758243.
- 561 [35] Scheuren AC, Hulst G, Kuhn GA, Masschelein E, Wehrle E, De Bock K, Müller R.  
562 Hallmarks of frailty and osteosarcopenia in prematurely aged PolgA<sup>D257A/D257A</sup> mice. *J*  
563 *Cachexia Sarcopenia Muscle*, 2020:Forthcoming.
- 564 [36] Kujoth GC, Hiona A, Pugh TD, Someya S, Panzer K, Wohlgemuth SE, Hofer T, Seo  
565 AY, Sullivan R, Jobling WA, Morrow JD, Van Remmen H, Sedivy JM, Yamasoba T,  
566 Tanokura M, Weindruch R, Leeuwenburgh C, Prolla TA. Mitochondrial DNA  
567 mutations, oxidative stress, and apoptosis in mammalian aging. *Science*, 2005;  
568 309(5733):481.
- 569 [37] Trifunovic A, Wredenberg A, Falkenberg M, Spelbrink JN, Rovio AT, Bruder CE,  
570 Bohlooly YM, Gidlof S, Oldfors A, Wibom R, Tornell J, Jacobs HT, Larsson NG.  
571 Premature ageing in mice expressing defective mitochondrial DNA polymerase. *Nature*,  
572 2004; 429(6990):417-423.

- 573 [38] Bellantuono I, de Cabo R, Ehninger D, Di Germanio C, Lawrie A, Miller J, Mitchell SJ,  
574 Navas-Enamorado I, Potter PK, Tchkonina T, Trejo JL, Lamming DW. A toolbox for the  
575 longitudinal assessment of healthspan in aging mice. *Nat Protoc*, 2020.
- 576 [39] Whitehead JC, Hildebrand BA, Sun M, Rockwood MR, Rose RA, Rockwood K,  
577 Howlett SE. A clinical frailty index in aging mice: comparisons with frailty index data  
578 in humans. *J Gerontol A Biol Sci Med Sci*, 2014; 69(6):621-632.
- 579 [40] Kuznetsova A, Brockhoff PB, Christensen RHB. lmerTest Package: Tests in linear  
580 mixed effects models. *J Stat Softw*, 2017; 82(13):1-26.
- 581 [41] Faul F, Erdfelder E, Lang AG, Buchner A. G\*Power 3: a flexible statistical power  
582 analysis program for the social, behavioral, and biomedical sciences. *Behav Res*  
583 *Methods*, 2007; 39(2):175-191.
- 584 [42] Geurts J, Nasi S, Distel P, Müller-Gerbl M, Prolla TA, Kujoth GC, Walker UA, Hügler  
585 T. Prematurely aging mitochondrial DNA mutator mice display subchondral osteopenia  
586 and chondrocyte hypertrophy without further osteoarthritis features. *Sci Rep*, 2020;  
587 10(1):1296.
- 588 [43] Eriksen EF. Normal and pathological remodeling of human trabecular bone: three  
589 dimensional reconstruction of the remodeling sequence in normals and in metabolic  
590 bone disease. *Endocr Rev*, 1986; 7(4):379-408.
- 591 [44] Robey PG, Bianco P, *CHAPTER 14 - Cellular mechanisms of age-related bone loss*, in  
592 *The Aging Skeleton*, Clifford J. Rosen, Julie Glowacki, and John P. Bilezikian, Editors.  
593 1999, Academic Press: San Diego. p. 145-157.
- 594 [45] Bouxsein ML, Myers KS, Shultz KL, Donahue LR, Rosen CJ, Beamer WG.  
595 Ovariectomy-induced bone loss varies among inbred strains of mice. *J Bone Miner Res*,  
596 2005; 20(7):1085-1092.



- 597 [46] Willey JS, Livingston EW, Robbins ME, Bourland JD, Tirado-Lee L, Smith-Sielicki H,  
598 Bateman TA. Risedronate prevents early radiation-induced osteoporosis in mice at  
599 multiple skeletal locations. *Bone*, 2010; 46(1):101-111.
- 600 [47] Bell EG, McAfee JG, Constable WC. Local radiation damage to bone and marrow  
601 demonstrated by radioisotopic imaging. *Radiology*, 1969; 92(5):1083-1088.
- 602 [48] Pacheco R, Stock H. Effects of radiation on bone. *Curr Osteoporos Rep*, 2013;  
603 11(4):299-304.
- 604
- 605

## 606 **Supporting information**

607 **Table S1. The effects of imaging session number (group), genotype and the interaction**  
608 **effect (genotype\*group) on bone morphometric parameters and frailty index (FI) at 40**  
609 **weeks of age were compared via two-way ANOVA analysis. The p-values and effect sizes**  
610 **(*f*) of the main and interaction effects, respectively are listed below (significance level  $\alpha = 0.05$ ).**

611 **Table S2. P-values, effect sizes (*f*) and achieved power obtained by cross-sectional (one-**  
612 **way ANOVA) and longitudinal analysis (paired t-test). (Significance level  $\alpha = 0.05$ ).**
